# Supplementary material for: The Impact of Mutation of Myelodysplasia-Related Genes in De Novo Acute Myeloid Leukemia Carrying NPM1 Mutation
Source: MDPI journal article supplement (doi:10.3390/cancers15010198), 2022-12-29
Supplement: s1 [file s1]

## Supplementary Materials

**Table S1.** Eighty-one-gene NGS panel.

|                |               |                |               |               |
|----------------|---------------|----------------|---------------|---------------|
| <i>ANKRD26</i> | <i>GNAS</i>   | <i>KRAS</i>    | <i>RAD21</i>  | <i>STAT5A</i> |
| <i>ASXL1</i>   | <i>HNRNPK</i> | <i>MAP2K1</i>  | <i>RARA</i>   | <i>STAT5B</i> |
| <i>ASXL2</i>   | <i>HRAS</i>   | <i>MPL</i>     | <i>RUNX1</i>  | <i>SUZ12</i>  |
| <i>BCOR</i>    | <i>IDH1</i>   | <i>NF1</i>     | <i>SETBP1</i> | <i>TERC</i>   |
| <i>BCORL1</i>  | <i>IDH2</i>   | <i>NOTCH1</i>  | <i>SF1</i>    | <i>TERT</i>   |
| <i>BRAF</i>    | <i>IKZF1</i>  | <i>NPM1</i>    | <i>SF3A1</i>  | <i>TET2</i>   |
| <i>BRINP3</i>  | <i>IL2RG</i>  | <i>NRAS</i>    | <i>SF3B1</i>  | <i>TP53</i>   |
| <i>CALR</i>    | <i>IL7R</i>   | <i>PAX5</i>    | <i>SH2B3</i>  | <i>U2AF1</i>  |
| <i>CBL</i>     | <i>JAK1</i>   | <i>PHF6</i>    | <i>SMC1A</i>  | <i>U2AF2</i>  |
| <i>CBLB</i>    | <i>JAK2</i>   | <i>PIGA</i>    | <i>SMC3</i>   | <i>WT1</i>    |
| <i>CBLC</i>    | <i>JAK3</i>   | <i>PML</i>     | <i>SRSF2</i>  | <i>ZRSR2</i>  |
| <i>CEBPA</i>   | <i>KDM6A</i>  | <i>PRPF40B</i> | <i>STAG1</i>  |               |
| <i>CREBBP</i>  | <i>KIT</i>    | <i>PTEN</i>    | <i>STAG2</i>  |               |
| <i>CRLF2</i>   | <i>KMT2A</i>  | <i>PTPN11</i>  | <i>STAT3</i>  |               |

**Table S2.** Mutational Profile and Risk Group Assignment.

| Case Number | Risk Group | Mutational Profile                                               |
|-------------|------------|------------------------------------------------------------------|
| 1           | A          | <i>NPM1</i> , <i>IDH2</i> ,                                      |
| 2           | A          | <i>NPM1</i> , <i>IDH1</i> , <i>FLT3</i> -D835                    |
| 3           | A          | <i>NPM1</i> , <i>IDH1</i> , <i>FLT3</i> -D835                    |
| 4           | A          | <i>NPM1</i> , <i>FLT3</i> -D835, <i>N-RAS</i>                    |
| 5           | A          | <i>NPM1</i> , <i>DNMT3A</i> , <i>N-RAS</i>                       |
| 6           | A          | <i>NPM1</i> , <i>DNMT3A</i> , <i>N-RAS</i> ,                     |
| 7           | A          | <i>NPM1</i> , <i>DNMT3A</i> , <i>FLT3</i> -TKD                   |
| 8           | B          | <i>NPM1</i> , <i>FLT3</i> -ITD                                   |
| 9           | B          | <i>NPM1</i> , <i>FLT3</i> -ITD, <i>N-RAS</i>                     |
| 10          | B          | <i>NPM1</i> , <i>FLT3</i> -ITD, <i>TET2</i> , <i>IDH2</i>        |
| 11          | B          | <i>NPM1</i> , <i>FLT3</i> -ITD, <i>FLT3</i> -D835, <i>DNMT3A</i> |
| 12          | A          | <i>NPM1</i> , <i>TET2</i> , <i>DNMT3A</i>                        |
| 13          | A          | <i>NPM1</i> , <i>TET2</i>                                        |
| 14          | A          | <i>NPM1</i> , <i>TET2</i> , <i>FLT3</i> -D835, <i>GATA2</i>      |
| 15          | A          | <i>NPM1</i> , <i>TET2</i> , <i>DNMT3A</i>                        |
| 16          | A          | <i>NPM1</i> , <i>DNMT3A</i> , <i>TET2</i>                        |
| 17          | B          | <i>NPM1</i> , <i>FLT3</i> -ITD                                   |
| 18          | C          | <i>NPM1</i> , <i>ASXL1</i> , <i>TET2</i> , <i>TET2</i>           |
| 19          | B          | <i>NPM1</i> , <i>DNMT3A</i> , <i>FLT3</i> -ITD                   |
| 20          | A          | <i>NPM1</i> , <i>PTPN11</i> , <i>IDH1</i> , <i>FLT3</i> -D835    |
| 21          | A          | <i>NPM1</i> , <i>DNMT3A</i> , <i>TET2</i>                        |
| 22          | A          | <i>NPM1</i> , <i>FLT3</i> -D835                                  |
| 23          | A          | <i>NPM1</i>                                                      |
| 24          | A          | <i>NPM1</i> , <i>DNMT3A</i> , <i>IDH1</i>                        |
| 25          | A          | <i>NPM1</i> , <i>FLT3</i> -D835                                  |
| 26          | A          | <i>NPM1</i>                                                      |
| 27          | C          | <i>NPM1</i> , <i>TET2</i> , <i>FLT3</i> -D835, <i>SRSF2</i>      |
| 28          | A          | <i>NPM1</i> , <i>IDH2</i> , <i>FLT3</i> -D835                    |
| 29          | B          | <i>NPM1</i> , <i>IDH1</i> , <i>IDH2</i> , <i>FLT3</i> -ITD       |
| 30          | B          | <i>NPM1</i> , <i>NPM1</i> , <i>FLT3</i> -ITD, <i>WT1</i>         |
| 31          | B          | <i>NPM1</i> , <i>FLT3</i> -ITD, <i>WT1</i>                       |

|    |   |                                                           |
|----|---|-----------------------------------------------------------|
| 32 | B | NPM1, DNMT3A, <b>FLT3-ITD</b>                             |
| 33 | D | NPM1, FLT3-D835, WT1                                      |
| 34 | B | NPM1, FLT3-ITD, IDH2                                      |
| 35 | B | NPM1, FLT3-ITD, WT1                                       |
| 36 | B | NPM1, FLT3-ITD, DNMT3A                                    |
| 37 | B | NPM1, FLT3-ITD, DNMT3A                                    |
| 38 | B | NPM1, FLT3-ITD, DNMT3A                                    |
| 39 | B | NPM1, FLT3-ITD, DNMT3A, NOTCH1                            |
| 40 | B | NPM1, FLT3-ITD, PTPN11                                    |
| 41 | C | NPM1, IDH2, TP53                                          |
| 42 | C | NPM1, TP53, DNMT3A, N-RAS, K-RAS, KIT, MLL, GATA2, NOTCH1 |
| 43 | B | NPM1, IDH2, FLT3-ITD                                      |
| 44 | B | NPM1, DNMT3A, FLT3-ITD, WT1                               |
| 45 | A | NPM1, FLT3-TKD                                            |
| 46 | B | NPM1, PTPN11, FLT3-ITD                                    |
| 47 | B | NPM1, FLT3-ITD, FLT3-ITD, FLT3-ITD                        |
| 48 | A | NPM1, TET2, TET2                                          |
| 49 | D | NPM1, N-RAS, WT1                                          |
| 50 | B | NPM1, FLT3-ITD                                            |
| 51 | B | NPM1, DNMT3A, IDH2, FLT3-ITD                              |
| 52 | B | NPM1, FLT3-ITD, FLT3-ITD, FLT3-ITD, FLT3-D835+            |
| 53 | A | NPM1, DNMT3A, TET2, TET2                                  |
| 54 | A | NPM1, TET2, DNMT3A, <b>FLT3-V592G</b>                     |
| 55 | B | NPM1, FLT3-ITD, FLT3-TKD, <b>FLT3-ITD</b> , CEBPA         |
| 56 | C | NPM1, K-RAS, RUNX1, TET2, TET2, TET2                      |
| 57 | C | NPM1, EZH2, IDH1                                          |
| 58 | B | NPM1, DNMT3A, FLT3-ITD, TET2, WT1+                        |
| 59 | C | NPM1, TET2, GATA2, RUNX1                                  |
| 60 | B | NPM1, FLT3-ITD                                            |
| 61 | D | NPM1, <b>FLT3-D835</b> , <b>WT1+</b>                      |
| 62 | C | NPM1, DNMT3A, PTPN11, ASXL1                               |
| 63 | B | NPM1, FLT3-ITD, WT1, <b>WT1+</b>                          |
| 64 | B | NPM1, DNMT3A, IDH2, N-RAS, <b>FLT3-ITD</b>                |
| 65 | B | NPM1, FLT3-ITD, +                                         |
| 66 | D | NPM1, WT1, ETV6, TET2                                     |
| 67 | A | NPM1, FLT3-TKD                                            |
| 68 | C | NPM1, IDH2, SRSF2                                         |
| 69 | C | NPM1, SRSF2, CBL                                          |
| 70 | A | NPM1, TET2, IDH2, DNMT3A                                  |
| 71 | A | NPM1, IDH2                                                |
| 72 | A | NPM1, TET2, DNMT3A                                        |
| 73 | B | NPM1, FLT3-ITD                                            |
| 74 | B | NPM1, DNMT3A, FLT3-ITD                                    |
| 75 | A | NPM1, IDH2, N-RAS                                         |
| 76 | B | NPM1, FLT3-ITD, IDH2, NOTCH                               |
| 77 | A | NPM1, FLT3-D835                                           |
| 78 | A | NPM1, IDH2                                                |
| 79 | A | NPM1, IDH1                                                |
| 80 | B | NPM1, DNMT3A, FLT3-ITD                                    |
| 81 | A | NPM1, IDH1                                                |

|     |   |                                                         |
|-----|---|---------------------------------------------------------|
| 82  | A | <i>NPM1, IDH1, IDH2, K-RAS</i>                          |
| 83  | A | <i>NPM1, DNMT3A, IDH2</i>                               |
| 84  | A | <i>NPM1, IDH2, FLT3-V592G</i>                           |
| 85  | A | <i>NPM1, TET2, TET2</i>                                 |
| 86  | A | <i>NPM1, FLT3-TKD, TET2, TET2</i>                       |
| 87  | B | <i>NPM1, TET2, FLT3-ITD</i>                             |
| 88  | C | <i>NPM1, ASXL1, N-RAS, TET2</i>                         |
| 89  | A | <i>NPM1, DNMT3A, N-RAS</i>                              |
| 90  | A | <i>NPM1, FLT3-TKD</i>                                   |
| 91  | C | <i>NPM1, ASXL1, GATA2, TET2</i>                         |
| 92  | A | <i>NPM1, TET2, TET2</i>                                 |
| 93  | A | <i>NPM1, DNMT3A, IDH1, FLT3-TKD</i>                     |
| 94  | B | <i>NPM1, FLT3-ITD, N-RAS</i>                            |
| 95  | A | <i>NPM1, TET2, FLT3-TKD, DNMT3A</i>                     |
| 96  | A | <i>NPM1, DNMT3A, N-RAS</i>                              |
| 97  | A | <i>NPM1, K-RAS</i>                                      |
| 98  | B | <i>NPM1, FLT3-ITD, IDH2</i>                             |
| 99  | A | <i>NPM1, TET2</i>                                       |
| 100 | B | <i>NPM1, WT1, FLT3-ITD</i>                              |
| 101 | B | <i>NPM1, FLT3-ITD, TET2, DNMT3A, K-RAS</i>              |
| 102 | B | <i>NPM1, FLT3-ITD, IDH2</i>                             |
| 103 | B | <i>NPM1, DNMT3A, FLT3-ITD, PTPN11</i>                   |
| 104 | B | <i>NPM1, DNMT3A, DNMT3A, IDH1, TET2, FLT3-ITD, EGFR</i> |
| 105 | B | <i>NPM1, FLT3-ITD, PTPN11</i>                           |
| 106 | B | <i>NPM1, DNMT3A, IDH1, FLT3-ITD</i>                     |
| 107 | B | <i>NPM1, FLT3-ITD, TET2, DNMT3A</i>                     |

Cases 1–69 were treated intensively, and cases 70–107 were treated with reduced intensity; risk-group assignment: Group A, without MDS-related gene mutations; Group B, with *FLT3-ITD*; Group C, with MDS-related gene mutations; Group D, with *WT1* mutation. Mutations gained at relapse are in red; †, abnormal cytogenetics detected at relapse or shortly after.

**Table S3.** Comparison between subgroups of patients without MDS-related gene mutations (Group A) versus with *FLT3-ITD* (Group B) treated with intensive chemotherapy.

|                                   | Group A           | Group B          | <i>p</i> -Value |
|-----------------------------------|-------------------|------------------|-----------------|
| Number                            | 25                | 30               | N/A             |
| Age (years) median and range      | 57, (17–69)       | 51.5, (19–67)    | 0.30            |
| Age > 65 years                    | 4 (16.00%)        | 5 (16.67%)       | >0.9999         |
| Sex:                              |                   |                  |                 |
| -Men                              | 13 (52.00%)       | 14 (46.67%)      | 0.79            |
| -Women                            | 12 (48.00%)       | 16 (53.33%)      |                 |
| BM blasts (%) median and range    | 51.5, (4–94)      | 68, (1–95)       | 0.25            |
| WBC (k/μL) median and range       | 11.2, (0.5–378.4) | 14.9, (1–160.4)  | 0.46            |
| PB blasts (%) median and range    | 23.5, (0–97)      | 35.5, (0–98)     | 0.58            |
| Hb (g/dL) median and range        | 8.95, (5.1–12.4)  | 9.35, (7.7–15.5) | 0.16            |
| platelets (k/μL) median and range | 53, (11–385)      | 57.5, (9–553)    | 0.38            |
| Response:                         |                   |                  |                 |
| -CR/CRi                           | 23/25 (92.00%)    | 22/29 (75.86%)   | 0.15            |
| -MLFS                             | 2/25 (8.00%)      | 7/29 (24.14%)    |                 |
| -Refractory                       | 0 (0.00%)         | 0 (0.00%)        | 0.38            |
| MMD (EOC1)                        | 6/25 (24.00%)     | 11/29 (37.93%)   |                 |
| MMD (EOC2)                        | 4/25 (16.00%)     | 7/29 (24.14%)    | 0.52            |
| Relapse                           | 3 (12.00%)        | 15 (50.00%)      | <b>0.0037</b>   |

|                                     |    |       |               |
|-------------------------------------|----|-------|---------------|
| Median OS (months)                  | NR | 56.90 | <b>0.017</b>  |
| Median OS (months) (HSCT censored)  | NR | NR    | 0.15          |
| Median PFS (months)                 | NR | 62.10 | <b>0.0013</b> |
| Median PFS (months) (HSCT censored) | NR | NR    | <b>0.019</b>  |

All values taken at diagnosis; normal range, WBC, 4.0–11.0 k/ $\mu$ L; hemoglobin, 14–18 g/dL; platelets, 140–440 k/ $\mu$ L; Group A, without MDS-related gene mutations; Group B, with *FLT3*-ITD; BM, bone marrow; WBC, white blood cell; PB, peripheral blood; Hb, hemoglobin; CR, complete remission; Cri, CR with incomplete blood count recovery; MLFS, morphological leukemia-free status; MMD, minimal measurable disease; EOC1, end of cycle 1 induction; EOC2, end of cycle 2 induction; OS, overall survival; HSCT, hematopoietic stem cell transplantation; PFS, progression-free survival; NR, median survival not reached. *p*-values in bold are of statistical significance.

**Table S4.** Comparison between subgroups of patients with *FLT3*-ITD (Group B) versus with MDS-related gene mutations (Group C) treated with intensive chemotherapy.

|                                         | Group B          | Group C          | <i>p</i> -Value |
|-----------------------------------------|------------------|------------------|-----------------|
| Number                                  | 30               | 10               | N/A             |
| Age (years) median and range            | 51.5, (19–67)    | 59, (33–68)      | 0.55            |
| Age > 65 years                          | 5 (16.67%)       | 3 (30%)          | 0.39            |
| Sex:                                    |                  |                  |                 |
| -Men                                    | 14 (46.67%)      | 6 (60.00%)       | 0.72            |
| -Women                                  | 16 (53.33%)      | 4 (40.00%)       |                 |
| BM blasts (%) median and range          | 68, (1–95)       | 67, (19–86)      | 0.50            |
| WBC (k/ $\mu$ L) median and range       | 14.9, (1–160.4)  | 17.95, (1–44.1)  | 0.22            |
| PB blasts (%) median and range          | 35.5, (0–98)     | 16, (0–83)       | 0.18            |
| Hb (g/dL) median and range              | 9.35, (7.7–15.5) | 9.15, (8.5–14.4) | 0.45            |
| platelets (k/ $\mu$ L) median and range | 57.5, (9–553)    | 29.5, (7–87)     | 0.10            |
| Response:                               |                  |                  |                 |
| -CR/CRi                                 | 22/29 (75.86%)   | 7/10 (70.00%)    | 0.056           |
| -MLFS                                   | 7/29 (24.14%)    | 1/10 (10.00%)    |                 |
| -Refractory                             | 0 (0.00%)        | 2/10 (20.00%)    |                 |
| MMD (EOC1)                              | 11/29 (37.93%)   | 5/8 (62.50%)     | 0.25            |
| MMD (EOC2)                              | 7/29 (24.14%)    | 2/8 (25.00%)     | >0.9999         |
| Relapse                                 | 15 (50.00%)      | 7 (70.00%)       | 0.46            |
| Median OS (months)                      | 56.90            | 50.80            | 0.89            |
| Median OS (months) (HSCT censored)      | NR               | NR               | 0.53            |
| Median PFS (months)                     | 62.10            | 14.60            | 0.28            |
| Median PFS (months) (HSCT censored)     | NR               | 24.3             | 0.12            |

All values taken at diagnosis; normal range, WBC, 4.0–11.0 k/ $\mu$ L; hemoglobin, 14–18 g/dL; platelets, 140–440 k/ $\mu$ L; Group B, with *FLT3*-ITD; Group C, with MDS-related gene mutations; BM, bone marrow; WBC, white blood cell; PB, peripheral blood; Hb, hemoglobin; CR, complete remission; CRi, CR with incomplete blood count recovery; MLFS, morphological leukemia-free status; MMD, minimal measurable disease; EOC1, end of cycle 1 induction; EOC2, end of cycle 2 induction; OS, overall survival; HSCT, hematopoietic stem cell transplantation; PFS, progression-free survival; NR, median survival not reached.

**Table S5.** Abnormal karyotype identified at or after relapse.

| Case Number | Risk Group | Karyotype                                                                                              |
|-------------|------------|--------------------------------------------------------------------------------------------------------|
| 52          | B          | 46,XY,t(14;15)(q32;q22)[2]                                                                             |
| 58          | B          | 46,XY,inv(1q),t(4;10),t(6;17)[3]/46,XY,t(17;20)[cp2]/46,XY,inv(1q),t(3;4)[1]/46,XY,t(1;4)[1]/46,XY [3] |
| 61          | D          | 46,XX,add(1)(p13),add(7)(q22),t(12;22;17)(p13;q11.2;p13)[cp3]/46,XX [8]                                |
| 62          | C          | 46,XY,del(1)(q21q22)[5]/46,Y,del(X)(q24q26)[1]/46,XY [14]                                              |

|    |   |                                                                                                                    |
|----|---|--------------------------------------------------------------------------------------------------------------------|
| 63 | B | 46,XX,add(2)(p11.2),del(11)(q13),add(15)(q22),der(19)t(11;19)(q13;q13.1),add(15)(q22)[1]/47,idem,+13[6]/46,XX [13] |
| 65 | B | 46,XY,t(4;6)(q21;p25),add(13)(q31)[7]t(11;12)(p14;q21)[2]                                                          |

---

Risk group assignment: Group B, with *FLT3*-ITD; Group C, with MDS-related gene mutations; Group D, with *WT1* mutation.
